# Supplementary material for: Decomposing Additive Genetic Variance Revealed Novel Insights into Trait Evolution in Synthetic Hexaploid Wheat
Source: Front Genet. 2018 Feb 6;9:27. doi: 10.3389/fgene.2018.00027 (PMC5807918; doi:10.3389/fgene.2018.00027)
Supplement: Table S3 — The additive variance for different traits and its partitioning (as percentage of the total heritability) into different chromosomes, chromosomal groups and subgenomes for subset of the whole data set that includes 80% of our SNPs. [file DataSheet3.XLSX]

## Sheet: TableS3
Chr	Size (Mb)	Al	Br	CCN	Cr	Lr	Pn	Pt	SNG	SNL	Sr	YLS	Yr
Whole_He	16946	50.24	51.04	43.95	49.75	49.23	49.1	45.54	59.97	49.49	44.42	54.21	48.8
1A	798	4.16003	5.24596	3.32196	8.24121	6.23603	1.00908	6.69741	5.28598	0	0	4.08013	6.59836
2A	899	0	7.28286	4.61889	0	5.32196	0	0	3.68518	6.84987	0	1.43356	0.184426
3A	828	8.75796	3.59339	4.7099	0	8.00325	10.2725	6.25823	4.7357	0	0	4.81529	11.168
4A	856	2.50796	6.78324	13.6291	13.0653	6.70323	3.22906	0.548968	6.6033	0.687007	2.43486	5.55045	0
5A	827	5.11545	7.85934	0	0	2.92505	4.13724	4.19412	12.673	4.76864	0	2.51792	1.55738
6A	705	9.61385	0	0	0	4.69226	0	0.966184	4.43555	6.32451	5.57454	0	0
7A	814	7.42436	0	0	4.32161	5.58602	6.72048	2.56917	5.25263	0	10.4443	0	0
1B	849	0	0	0	0	0.893764	0	0	2.08438	15.3162	4.63477	4.025	0
2B	928	2.12978	10.7802	0	3.9397	2.76254	7.28557	5.88494	2.50125	7.69852	16.0188	8.25216	0
3B	993	7.44427	9.99231	10.3754	7.69849	5.60634	4.23814	13.9877	8.88778	4.18266	12.6228	6.76346	1.51639
4B	821	1.63217	1.13374	0	9.40704	3.92037	6.9223	9.88142	0.6003	8.68862	14.9082	8.60136	5.02049
5B	870	1.57245	0.787855	6.32537	2.93467	4.85476	10.2523	0.636803	2.76805	9.19378	6.98419	13.4534	16.25
6B	913	7.26513	9.53113	5.64278	6.19095	5.22039	9.48537	0	9.78823	0	0	0	2.7459
7B	900	0	2.17141	9.26052	0	5.05789	5.24723	0	0	2.02061	11.4054	0	7.86885
1D	605	9.91242	9.87702	7.48578	7.01508	3.92037	2.94652	3.82082	14.1904	9.47666	0	8.25216	0
2D	729	16.3416	0.76864	16.0637	6.45226	6.07353	8.71645	0	0	2.0004	3.33191	9.85113	0
3D	771	5.7922	4.51576	1.88851	20.7437	0	4.34612	9.9473	4.68568	5.85977	1.81546	7.79269	5.88115
4D	649	0.457803	0	9.55631	4.82412	0	0	19.3456	3.8019	0	0	0	6.65984
5D	750	0	6.6103	7.12173	2.27136	2.2141	7.19173	10.8696	4.9358	0	4.01538	0	11.9672
6D	713	2.82643	4.43889	0	0	7.73918	0	2.7668	3.08488	4.56658	0	8.49109	0
7D	728	7.04618	8.62798	0	2.89447	12.2689	8.00135	1.62495	0	12.3661	5.80948	6.1202	22.582
Group1	2252	14.0725	15.123	10.8077	15.2563	11.0502	3.9556	10.5182	21.5608	24.7929	4.63477	16.3573	6.59836
Group2	2556	18.4713	18.8317	20.6826	10.392	14.158	18.002	5.88494	6.18643	16.5488	19.3507	19.5368	0.184426
Group3	2592	21.9944	18.1015	16.9738	28.4422	13.6096	21.8567	30.1932	18.3092	10.0424	14.4383	19.3714	18.5656
Group4	2326	4.59793	7.91699	23.1854	27.2965	10.6236	10.1514	29.776	11.0055	9.37563	17.343	14.1518	11.6803
Group5	2447	6.6879	15.2575	13.4471	5.20603	9.99391	24.5812	15.7005	20.3769	13.9624	10.9996	15.9713	29.7746
Group6	2331	19.7054	13.97	5.64278	6.19095	17.6518	9.48537	3.73298	17.3087	10.8911	5.57454	8.49109	2.7459
Group7	2442	14.4705	10.7994	9.26052	7.21608	22.9129	11.9677	4.19412	5.25263	14.3867	27.6591	6.1202	30.4508
A	5727	37.5796	30.7648	26.2799	25.6281	39.4678	25.3683	21.2341	42.6713	18.63	18.4537	18.3974	19.5082
B	6274	20.0438	34.3966	31.6041	30.1709	28.3161	43.4309	30.3909	26.63	47.1004	66.5741	41.0954	33.4016
D	4945	42.3766	34.8386	42.116	44.201	32.2161	31.2008	48.3751	30.6987	34.2695	14.9722	40.5073	47.0902
